# Supplementary material for: Effectiveness of bio-effectors on maize, wheat and tomato performance and phosphorus acquisition from greenhouse to field scales in Europe and Israel: a meta-analysis
Source: Frontiers journal article supplement (doi:10.3389/fpls.2024.1333249), 2024-04-02
Supplement: Data_Sheet_1.PDF [file Data_Sheet_1.PDF]

## Figures for supplementary materials

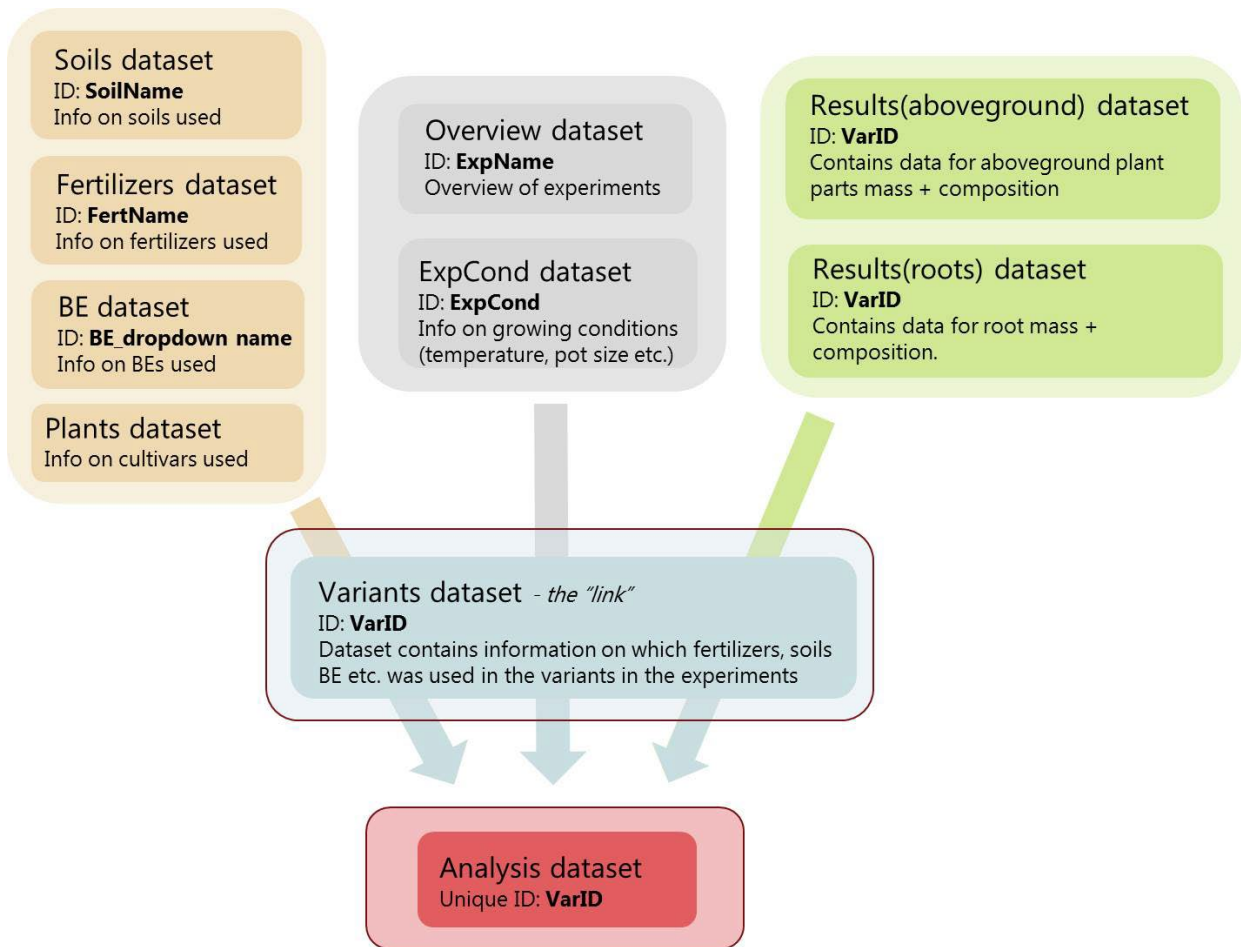

**Figure S1:** Overview of the structure of the BIOFECTOR database.

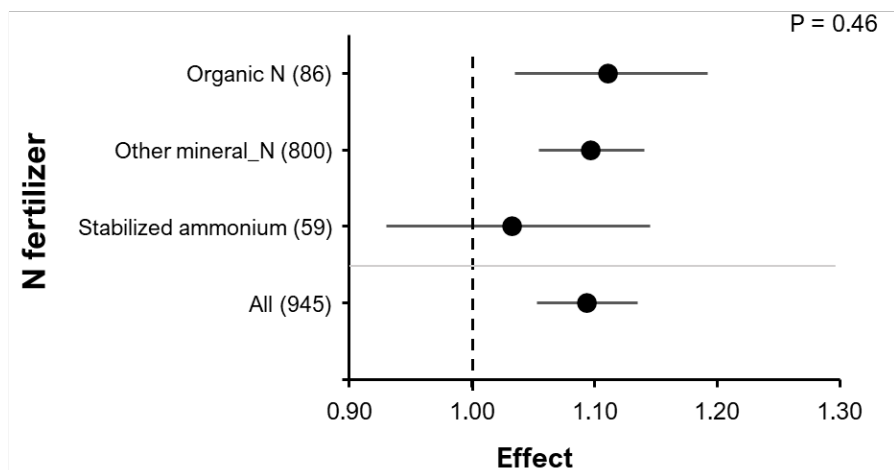

**Figure S2.** The effect of BE addition on yield (either grain DM, fruit DM, fruit FW or shoot DM) within all experiments as a function of N fertilizer type. A total of 945 observations from 290 clusters were included in the analysis. For each N-fertilizer type, the number inside the brackets represents the number of observations included, the point indicates the mean effect while the horizontal line represents the 95% C.I. The p-value indicates whether there was a significant effect of N-fertilizer type.

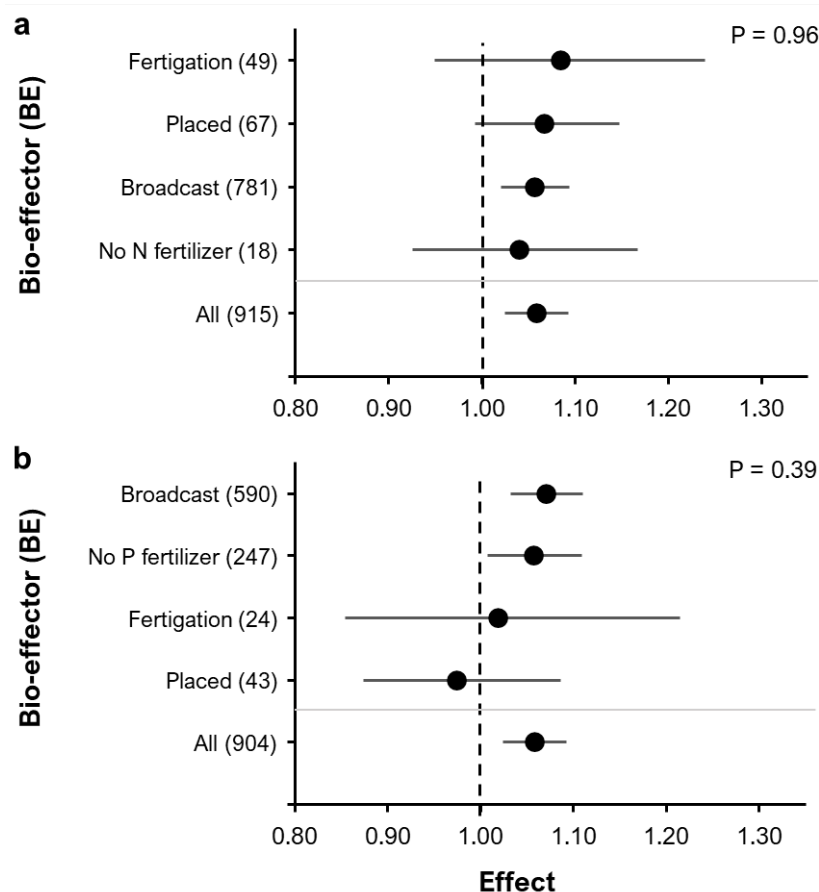

**Figure S3.** The effect of BE addition on yield (either grain DM, fruit DM, fruit FW or shoot DM) as a function of fertilizer application method: Application method for N-fertilizers (**a**) and P-fertilizers (**b**). For each fertilizer application method, the number inside the brackets represents the number of observations included, the point indicates the mean effect while the horizontal line represents the 95% C.I. The p-value indicates whether or not there was a significant effect of fertilizer application method.
